# Supplementary material for: Clinical Differences between SARS-CoV-2 and RSV Infections in Infants: Findings from a Case–Control Study
Source: MDPI journal article supplement (doi:10.3390/v16010063), 2023-12-30
Supplement: s1 [file s1]

**Supplementary material. Table S1.** Patient characteristics by age group and type of infection

|                         | Age group    | SARS-CoV-2 infection, n/N (%) | RSV infection, n/N (%) | p-value          | OR   | 95%CI       |
|-------------------------|--------------|-------------------------------|------------------------|------------------|------|-------------|
| Fever                   | Newborn      | 5/9 (55.6)                    | 1/9 (11.1)             | 0.046            | 10.0 | 0.85-117.01 |
|                         | 1-3 months   | <b>38/45 (84.4)</b>           | 7/45 (15.6)            | <b>&lt;0.001</b> | 29.5 | 9.42-92.20  |
|                         | 4-6 months   | <b>15/19 (78.9)</b>           | 9/19 (47.4)            | <b>0.044</b>     | 4.2  | 1.003-17.31 |
|                         | 7-9 months   | <b>12/13 (92.3)</b>           | 7/13 (53.8)            | <b>0.027</b>     | 10.3 | 1.01-103.95 |
|                         | 10-12 months | 7/8 (87.5)                    | 5/8 (62.5)             | 0.248            | 4.2  | 0.33-53.12  |
| Cough                   | Newborn      | 3/9 (33.3)                    | <b>9/9 (100)</b>       | <b>0.003</b>     | 0.3  | 0.13-0.84   |
|                         | 1-3 months   | 26/45 (57.8)                  | <b>45/45 (100)</b>     | <b>&lt;0.001</b> | 0.6  | 0.45-0.76   |
|                         | 4-6 months   | 16/19 (84.2)                  | 19/19 (100)            | 0.071            | 0.8  | 0.69-1.02   |
|                         | 7-9 months   | 12/13 (92.3)                  | 13/13 (100)            | 0.308            | 0.9  | 0.79-1.08   |
|                         | 10-12 months | 7/8 (87.5)                    | 8/8 (100)              | 0.302            | 0.9  | 0.67-1.14   |
| Nasal congestion        | Newborn      | 2/9 (22.2)                    | <b>8/9 (88.9)</b>      | <b>0.004</b>     | 0.4  | 0.003-0.48  |
|                         | 1-3 months   | 19/45 (42.2)                  | <b>29/45 (64.4)</b>    | <b>0.035</b>     | 0.4  | 0.17-0.94   |
|                         | 4-6 months   | 11/19 (57.9)                  | <b>18/19 (94.7)</b>    | <b>0.008</b>     | 0.1  | 0.008-0.70  |
|                         | 7-9 months   | 9/13 (69.2)                   | 7/13 (53.8)            | 0.420            | 1.9  | 0.39-9.60   |
|                         | 10-12 months | 4/8 (50.0)                    | 7/8 (87.5)             | 0.106            | 0.1  | 0.01-1.76   |
| Dispnee                 | Newborn      | 0/9 (0.0)                     | <b>7/9 (77.8)</b>      | <b>0.001</b>     | 0.2  | 0.07-0.75   |
|                         | 1-3 months   | 6/45 (13.3)                   | <b>33/45 (73.3)</b>    | <b>&lt;0.001</b> | 0.6  | 0.02-0.17   |
|                         | 4-6 months   | 3/19 (15.8)                   | <b>11/19 (57.9)</b>    | <b>0.007</b>     | 0.1  | 0.03-0.63   |
|                         | 7-9 months   | 2/13 (15.4)                   | <b>9/13 (69.2)</b>     | <b>0.005</b>     | 0.1  | 0.01-0.55   |
|                         | 10-12 months | 2/8 (25.0)                    | 6/8 (75.0)             | 0.046            | 0.1  | 0.01-1.07   |
| Diaree                  | Newborn      | 2/9 (22.2)                    | 0/9 (0.0)              | 0.134            | 1.3  | 0.90-1.82   |
|                         | 1-3 months   | <b>19/45 (42.2)</b>           | 7/45 (15.6)            | <b>0.005</b>     | 4.0  | 1.46-10.78  |
|                         | 4-6 months   | 3/19 (15.8)                   | 5/19 (26.3)            | 0.426            | 0.5  | 0.11-2.60   |
|                         | 7-9 months   | 3/13 (23.1)                   | 3/13 (23.1)            | 1.000            | 1.0  | 0.16-6.2    |
|                         | 10-12 months | 2/8 (25.0)                    | 0/8 (0.0)              | 0.131            | 1.3  | 0.89-1.99   |
| Vărsături               | Newborn      | 1/9 (11.1)                    | 0/9 (0.0)              | 0.303            | 1.1  | 0.89-1.41   |
|                         | 1-3 months   | 4/45 (8.9)                    | 8/45 (17.8)            | 0.215            | 0.5  | 0.13-1.62   |
|                         | 4-6 months   | 3/19 (15.8)                   | 3/19 (15.8)            | 1.000            | 1.0  | 0.18-5.72   |
|                         | 7-9 months   | 3/13 (23.1)                   | 2/13 (15.4)            | 0.619            | 1.7  | 0.23-11.99  |
|                         | 10-12 months | 1/8 (12.5)                    | 1/8 (12.5)             | 1.000            | 1.0  | 0.05-19.36  |
| Malaise                 | Newborn      | 1/9 (11.1)                    | 2/9 (22.2)             | 0.527            | 0.4  | 0.03-5.29   |
|                         | 1-3 months   | 6/45 (13.3)                   | <b>18/45 (40.0)</b>    | <b>0.004</b>     | 0.2  | 0.08-0.66   |
|                         | 4-6 months   | 2/19 (10.5)                   | 3/19 (15.8)            | 0.631            | 0.6  | 0.09-4.26   |
|                         | 7-9 months   | 3/13 (23.1)                   | 3/13 (23.1)            | 1.000            | 1.0  | 0.16-6.20   |
|                         | 10-12 months | 3/8 (37.5)                    | 5/8 (62.5)             | 0.317            | 0.4  | 0.05-2.73   |
| Epidemiological context | Newborn      | 4/9 (44.4)                    | 5/9 (55.6)             | 0.637            | 0.6  | 0.10-4.10   |
|                         | 1-3 months   | <b>27/45 (60.0)</b>           | 16/45 (35.6)           | <b>0.020</b>     | 2.7  | 1.16-6.38   |
|                         | 4-6 months   | <b>9/19 (47.4)</b>            | 3/19 (15.8)            | <b>0.036</b>     | 4.8  | 1.04-22.10  |
|                         | 7-9 months   | 4/13 (30.8)                   | 8/13 (61.5)            | 0.116            | 0.3  | 0.06-1.41   |
|                         | 10-12 months | 4/8 (50.0)                    | 2/8 (25.0)             | 0.302            | 3.0  | 0.36-24.92  |

|                                   |              |              |              |       |      |             |
|-----------------------------------|--------------|--------------|--------------|-------|------|-------------|
| Increased white blood cells count | Newborn      | 0/9 (0.0)    | 3/9 (33.3)   | 0.058 | 0.7  | 0.42-1.05   |
|                                   | 1-3 months   | 4/45 (8.9)   | 6/45 (13.3)  | 0.502 | 0.6  | 0.17-2.42   |
|                                   | 4-6 months   | 4/19 (21.1)  | 6/19 (31.6)  | 0.461 | 0.6  | 0.13-2.51   |
|                                   | 7-9 months   | 4/13 (30.8)  | 2/13 (15.4)  | 0.352 | 2.4  | 0.36-16.55  |
|                                   | 10-12 months | 6/8 (75.0)   | 1/8 (12.5)   | 0.012 | 21.0 | 1.50-293.25 |
| Decreased white blood cells count | Newborn      | 1/9 (11.1)   | 0/9 (0.0)    | NA    | NA   | NA          |
|                                   | 1-3 months   | 6/45 (13.3)  | 2/45 (4.4)   | 0.138 | 3.3  | 0.63-17.36  |
|                                   | 4-6 months   | 3/19 (15.8)  | 1/19 (5.3)   | 0.290 | 3.4  | 0.32-35.79  |
|                                   | 7-9 months   | 0/13 (0.0)   | 2/13 (15.4)  | NA    | NA   | NA          |
|                                   | 10-12 months | 0/8 (0.0)    | 2/8 (25.0)   | NA    | NA   | NA          |
| Increased neutrophil count        | Newborn      | 0/9 (0.0)    | 0/9 (0.0)    | NA    | NA   | NA          |
|                                   | 1-3 months   | 0/45 (0.0)   | 0/45 (0.0)   | NA    | NA   | NA          |
|                                   | 4-6 months   | 1/19 (5.3)   | 0/19 (0.0)   | NA    | NA   | NA          |
|                                   | 7-9 months   | 2/13 (15.4)  | 1/13 (7.7)   | 0.539 | 2.2  | 0.17-27.56  |
|                                   | 10-12 months | 2/8 (25.0)   | 0/8 (0.0)    | NA    | NA   | NA          |
| Decreased neutrophil count        | Newborn      | 4/9 (44.4)   | 1/9 (11.1)   | 0.114 | 6.4  | 0.54-74.89  |
|                                   | 1-3 months   | 17/45 (37.8) | 10/45 (22.2) | 0.107 | 2.1  | 0.84-5.36   |
|                                   | 4-6 months   | 2/19 (10.5)  | 3/19 (15.8)  | 0.631 | 0.6  | 0.09-4.26   |
|                                   | 7-9 months   | 1/13 (7.7)   | 2/13 (15.4)  | 0.539 | 0.5  | 0.04-5.79   |
|                                   | 10-12 months | 0/8 (0.0)    | 2/8 (25.0)   | NA    | NA   | NA          |
| Increased monocyte count          | Newborn      | 8/9 (88.9)   | 8/9 (88.9)   | 1.000 | 1.0  | 0.05-18.92  |
|                                   | 1-3 months   | 34/45 (75.6) | 39/45 (86.7) | 0.178 | 0.5  | 0.16-1.42   |
|                                   | 4-6 months   | 16/19 (84.2) | 15/19 (78.9) | 0.676 | 1.4  | 0.27-7.44   |
|                                   | 7-9 months   | 12/13 (92.3) | 11/13 (84.6) | 0.539 | 2.2  | 0.17-27.56  |
|                                   | 10-12 months | 8/8 (100)    | 3/8 (37.5)   | 0.007 | 2.7  | 1.09-6.53   |
| Increased lymphocyte count        | Newborn      | 3/9 (33.3)   | 6/9 (66.7)   | 0.157 | 0.3  | 0.04-1.78   |
|                                   | 1-3 months   | 14/45 (31.1) | 25/45 (55.6) | 0.019 | 0.4  | 0.15-0.86   |
|                                   | 4-6 months   | 7/19 (36.8)  | 15/19 (78.9) | 0.009 | 0.2  | 0.04-0.66   |
|                                   | 7-9 months   | 4/13 (30.8)  | 4/13 (30.8)  | 1.000 | 1.0  | 0.19-5.29   |
|                                   | 10-12 months | 5/8 (62.5)   | 1/8 (12.5)   | 0.039 | 11.7 | 0.92-147.56 |
| Decreased lymphocyte count        | Newborn      | 1/9 (11.1)   | 1/9 (11.1)   | 1.000 | 1.0  | 0.05-18.92  |
|                                   | 1-3 months   | 12/45 (26.7) | 1/45 (2.2)   | 0.001 | 16.0 | 1.98-129.2  |
|                                   | 4-6 months   | 6/19 (31.6)  | 1/19 (5.3)   | 0.036 | 8.3  | 0.89-77.57  |
|                                   | 7-9 months   | 0/13 (0.0)   | 1/13 (7.7)   | NA    | NA   | NA          |
|                                   | 10-12 months | 0/8 (0.0)    | 3/8 (37.5)   | NA    | NA   | NA          |
| Increased C-reactive protein      | Newborn      | 0/9 (0.0)    | 1/9 (11.1)   | NA    | NA   | NA          |
|                                   | 1-3 months   | 8/45 (17.8)  | 6/45 (13.3)  | 0.561 | 1.4  | 0.45-4.44   |
|                                   | 4-6 months   | 9/19 (47.4)  | 1/19 (5.3)   | 0.003 | 16.2 | 1.79-147.07 |
|                                   | 7-9 months   | 8/13 (61.5)  | 5/13 (38.5)  | 0.239 | 2.6  | 0.53-12.43  |
|                                   | 10-12 months | 6/8 (75.0)   | 2/8 (25.0)   | 0.046 | 9.0  | 0.94-86.52  |
| Increased AST                     | Newborn      | 2/9 (22.2)   | 3/9 (33.3)   | 0.599 | 0.6  | 0.07-4.64   |
|                                   | 1-3 months   | 5/45 (11.1)  | 18/45 (40.0) | 0.002 | 0.2  | 0.06-0.57   |
|                                   | 4-6 months   | 3/19 (15.8)  | 13/19 (68.4) | 0.001 | 0.1  | 0.02-0.42   |
|                                   | 7-9 months   | 1/13 (7.7)   | 8/13 (61.5)  | 0.004 | 0.05 | 0.005-0.53  |
|                                   | 10-12 months | 1/8 (12.5)   | 6/8 (75.0)   | 0.012 | 0.05 | 0.003-0.67  |

|                           |              |                             |                             |        |      |            |
|---------------------------|--------------|-----------------------------|-----------------------------|--------|------|------------|
| Increased ALT             | Newborn      | 1/9 (11.1)                  | 0/9 (0.0)                   | NA     | NA   | NA         |
|                           | 1-3 months   | 4/45 (8.9)                  | 5/45 (11.1)                 | 0.725  | 0.78 | 0.20-3.12  |
|                           | 4-6 months   | 2/19 (10.5)                 | 3/19 (15.8)                 | 0.631  | 0.63 | 0.09-4.26  |
|                           | 7-9 months   | 0/13 (0.0)                  | 1/13 (7.7)                  | NA     | NA   | NA         |
|                           | 10-12 months | 1/8 (12.5)                  | 0/8 (0.0)                   | NA     | NA   | NA         |
| Increased urea            | Newborn      | 1/9 (11.1)                  | 0/9 (0.0)                   | NA     | NA   | NA         |
|                           | 1-3 months   | 2/45 (4.4)                  | 0/45 (0.0)                  | NA     | NA   | NA         |
|                           | 4-6 months   | 0/19 (0.0)                  | 0/19 (0.0)                  | NA     | NA   | NA         |
|                           | 7-9 months   | 3/13 (23.1)                 | 0/13 (0.0)                  | NA     | NA   | NA         |
|                           | 10-12 months | 1/8 (12.5)                  | 0/8 (0.0)                   | NA     | NA   | NA         |
| Increased creatinine      | Newborn      | 0/9 (0.0)                   | 0/9 (0.0)                   | NA     | NA   | NA         |
|                           | 1-3 months   | 0/45 (0.0)                  | 0/45 (0.0)                  | NA     | NA   | NA         |
|                           | 4-6 months   | 0/19 (0.0)                  | 0/19 (0.0)                  | NA     | NA   | NA         |
|                           | 7-9 months   | 0/13 (0.0)                  | 0/13 (0.0)                  | NA     | NA   | NA         |
|                           | 10-12 months | 1/8 (12.5)                  | 0/8 (0.0)                   | NA     | NA   | NA         |
| Acute respiratory failure | Newborn      | 0/9 (0.0)                   | 4/9 (44.4)                  | 0.023  | 0.56 | 0.31-0.99  |
|                           | 1-3 months   | 1/45 (2.2)                  | 20/45 (44.4)                | <0.001 | 0.03 | 0.004-0.23 |
|                           | 4-6 months   | 0/19 (0.0)                  | 3/19 (15.8)                 | 0.071  | 0.84 | 0.69-1.02  |
|                           | 7-9 months   | 1/13 (7.7)                  | 5/13 (38.5)                 | 0.063  | 0.13 | 0.01-1.37  |
|                           | 10-12 months | 0/8 (0.0)                   | 3/8 (37.5)                  | 0.055  | 0.63 | 0.37-1.07  |
| Laryngitis                | Newborn      | 0/9 (0.0)                   | 0/9 (0.0)                   | NA     | NA   | NA         |
|                           | 1-3 months   | 0/45 (0.0)                  | 1/45 (2.2)                  | NA     | NA   | NA         |
|                           | 4-6 months   | 8/19 (42.1)                 | 2/19 (10.5)                 | 0.027  | 6.18 | 1.10-34.70 |
|                           | 7-9 months   | 5/13 (38.5)                 | 0/13 (0.0)                  | 0.013  | 1.63 | 1.06-2.50  |
|                           | 10-12 months | 2/8 (25.0)                  | 0/8 (0.0)                   | NA     | NA   | NA         |
| Days of hospitalization   | Newborn      | 3 days<br>(IQR: 0.5, 4.5)   | 5 days<br>(IQR: 3.0, 6.0)   | 0.136  | NA   | NA         |
|                           | 1-3 months   | 5 days<br>(IQR: 3.0, 7.0)   | 6 days<br>(IQR: 4.0, 8.0)   | 0.067  | NA   | NA         |
|                           | 4-6 months   | 5 days<br>(IQR: 3.0, 6.0)   | 4 days<br>(IQR: 2.0, 5.0)   | 0.116  | NA   | NA         |
|                           | 7-9 months   | 4 days<br>(IQR: 2.5, 6.5)   | 5 days<br>(IQR: 4.0, 7.0)   | 0.336  | NA   | NA         |
|                           | 10-12 months | 4.5 days<br>(IQR: 2.5, 7.0) | 5.5 days<br>(IQR: 3.5, 8.5) | 0.442  | NA   | NA         |

AST - aspartate aminotransferase, ALT - alanine aminotransferase; NA - Not applicable;

RSV - respiratory syncytial virus.

In bold black p-values with statistical significance. In bold blue the group with statistical significance
